# Supplementary material for: Dual-phase MoS2 as a high-performance sodium-ion battery anode
Source: Royal Society of Chemistry journal article supplement (doi:10.1039/c9ta11913b), 2020-01-01
Supplement: c9ta11913b1.pdf [file c9ta11913b1.pdf]

Supplementary Information

**Dual-Phase MoS<sub>2</sub> as a High-Performance Sodium-Ion Battery Anode**

Junxiong Wu,<sup>a</sup> Jiapeng Liu,<sup>a</sup> Jiang Cui,<sup>a</sup> Shanshan Yao,<sup>a</sup> Muhammad Ihsan-Ul-Haq,<sup>a</sup> Nauman Mubarak,<sup>a</sup> Emanuele Quattrocchi,<sup>a</sup> Francesco Ciucci,<sup>\*abc</sup> and Jang-Kyo Kim<sup>\*a</sup>

<sup>a</sup> Department of Mechanical and Aerospace Engineering, The Hong Kong University of Science and Technology, Clear Water Bay, Kowloon, Hong Kong, China.

<sup>b</sup> Department of Chemical and Biological Engineering, The Hong Kong University of Science and Technology, Clear Water Bay, Hong Kong, China

<sup>c</sup> Guangzhou HKUST Fok Ying Tung Research Institute, China

\* Corresponding author: francesco.ciucci@ust.hk, mejkkim@ust.hk

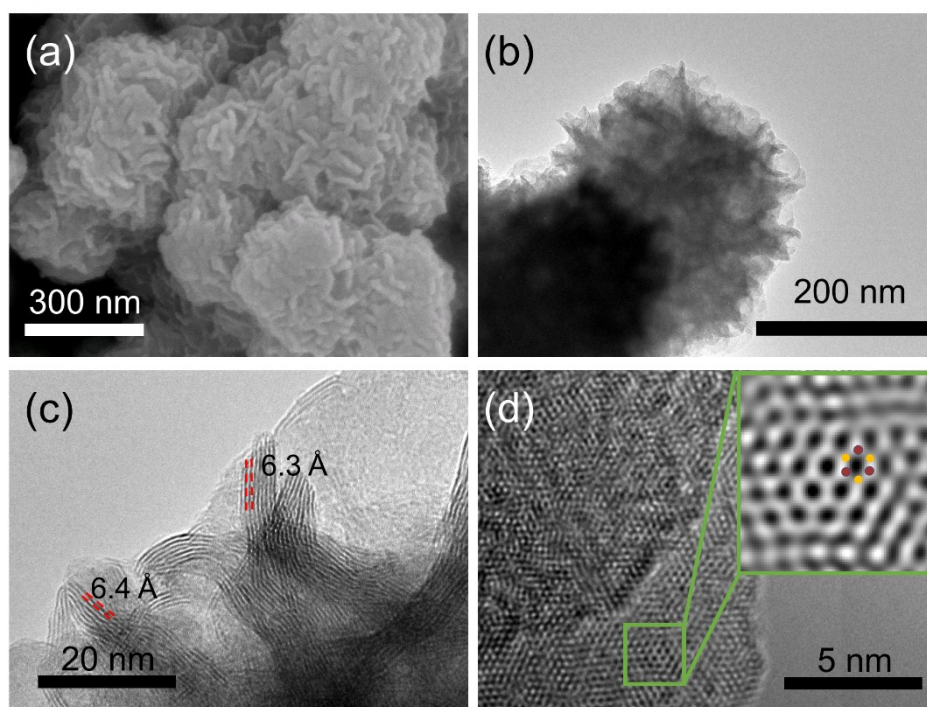

**Figure S1.** (a) SEM, (b) low-, and (c) high-magnification TEM and (d) HRTEM images of 2H-MoS<sub>2</sub>.

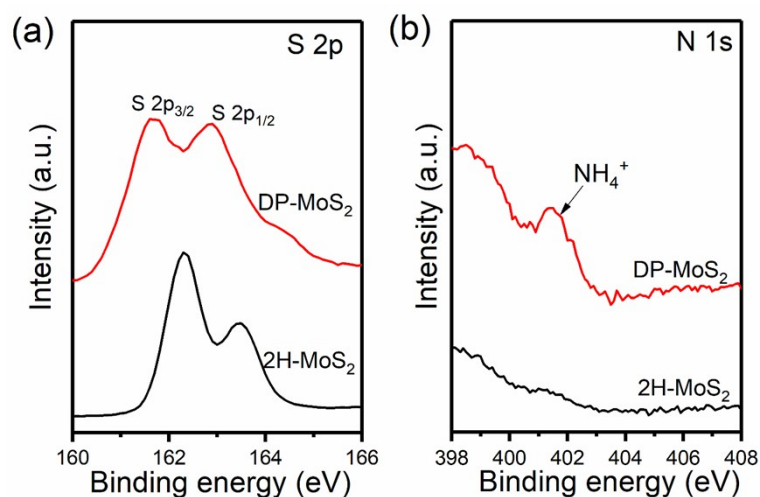

**Figure S2.** High resolution S 2p (a) and N 1s (b) XPS spectra of DP-MoS<sub>2</sub> and 2H-MoS<sub>2</sub>.

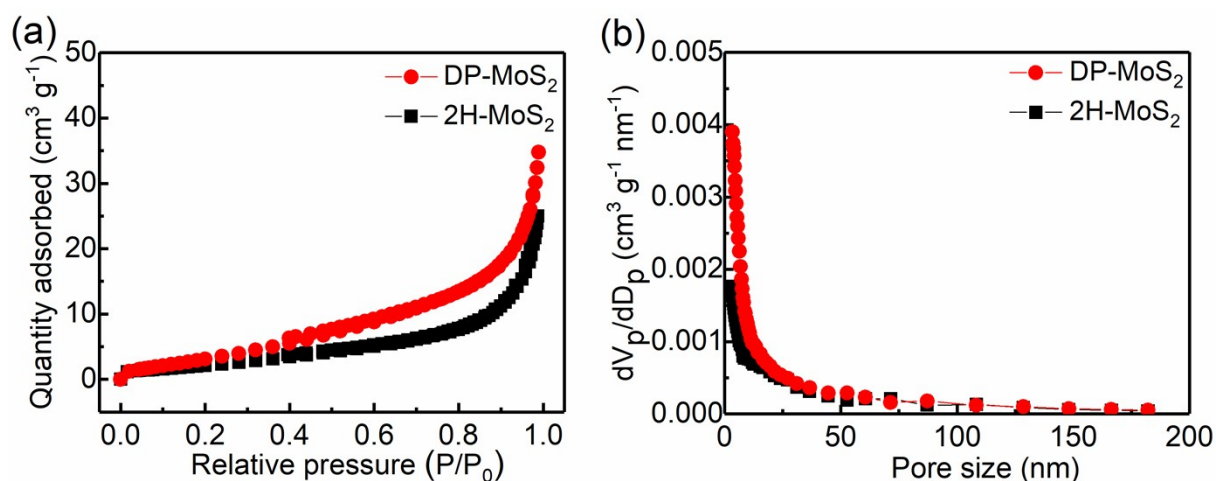

**Figure S3.** (a) N<sub>2</sub> adsorption/desorption isotherms and (b) pore size distribution curves of DP-MoS<sub>2</sub> and 2H-MoS<sub>2</sub>.

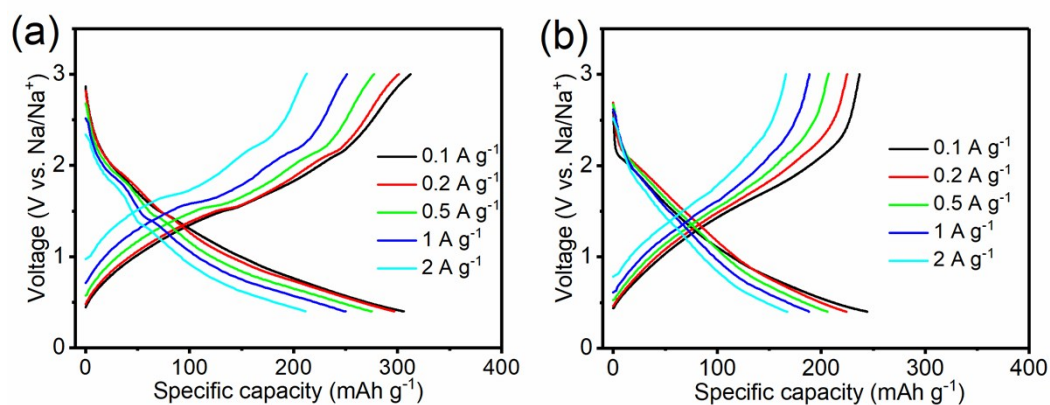

**Figure S4.** Charge/discharge curves of (a) the DP-MoS<sub>2</sub> and (b) 2H-MoS<sub>2</sub> electrodes at current densities varying from 0.1 A g<sup>-1</sup> to 2 A g<sup>-1</sup>.

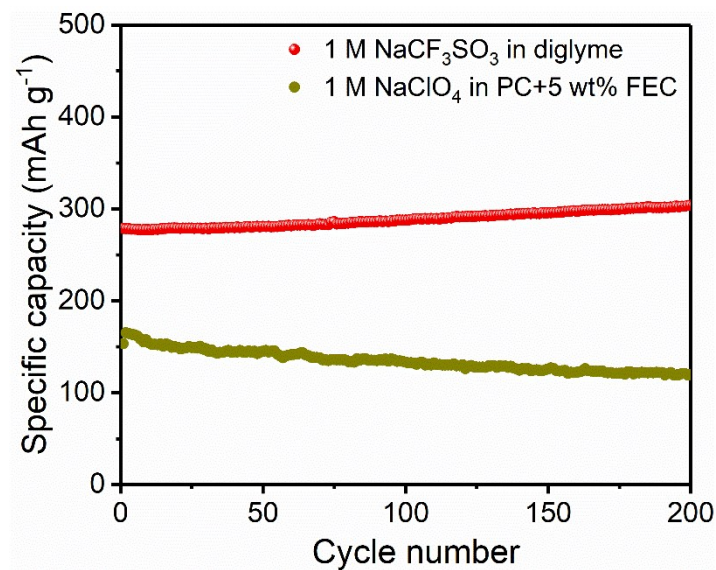

**Figure S5.** Cyclic performance of the DP-MoS<sub>2</sub> electrode in ether- and ester-based electrolytes.

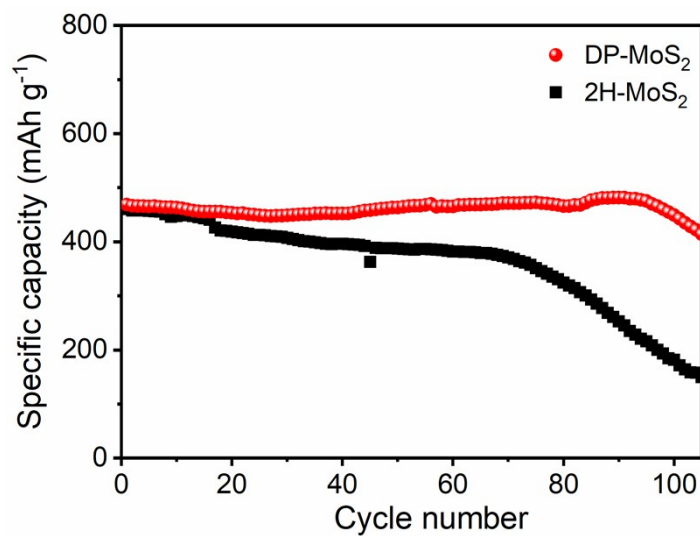

**Figure S6.** Cyclic performance of the DP-MoS<sub>2</sub> and 2H-MoS<sub>2</sub> electrodes at 0.5 A g<sup>-1</sup> in the voltage range from 0.01 to 3 V (vs. Na/Na<sup>+</sup>).

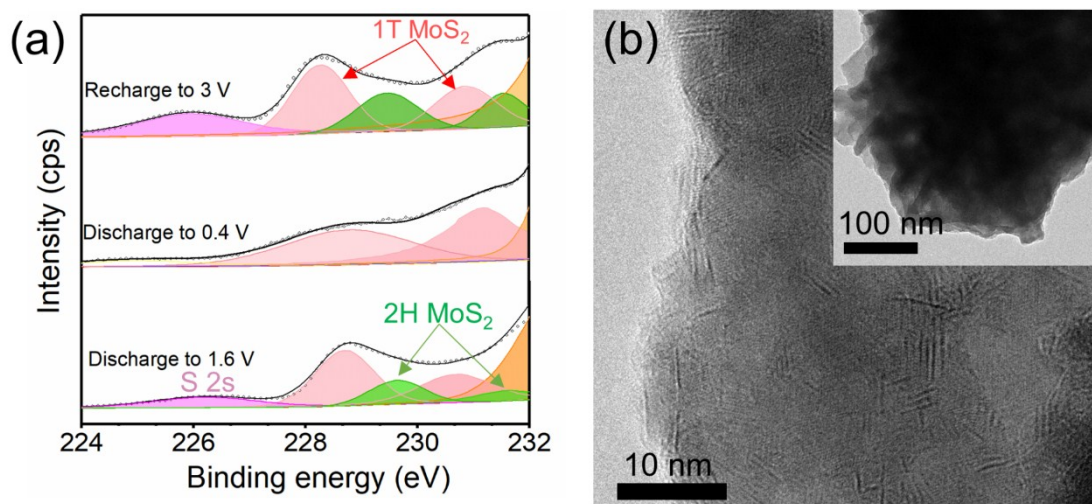

**Figure S7.** (a) *Ex-situ* XPS of DP-MoS<sub>2</sub> at different potentials; (b) HRTEM images of DP-MoS<sub>2</sub> taken after discharging to 0.4 V in the 100<sup>th</sup> cycle.

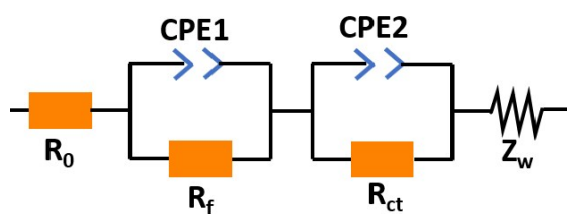

**Figure S8.** Equivalent circuit used for fitting the EIS data.

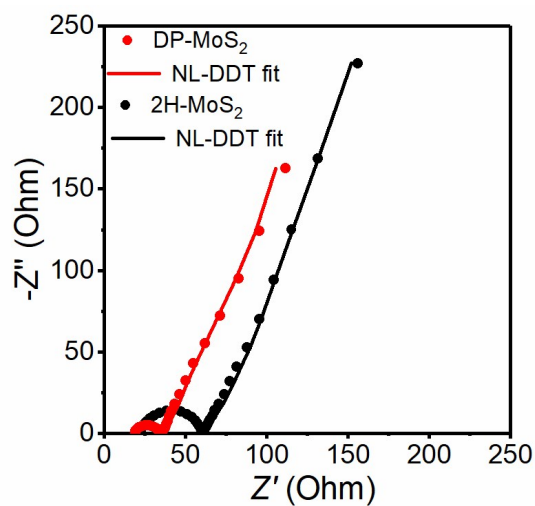

**Figure S9.** Nyquist plots with NL-DDT fit of Na//DP-MoS<sub>2</sub> and Na//2H-MoS<sub>2</sub> batteries.

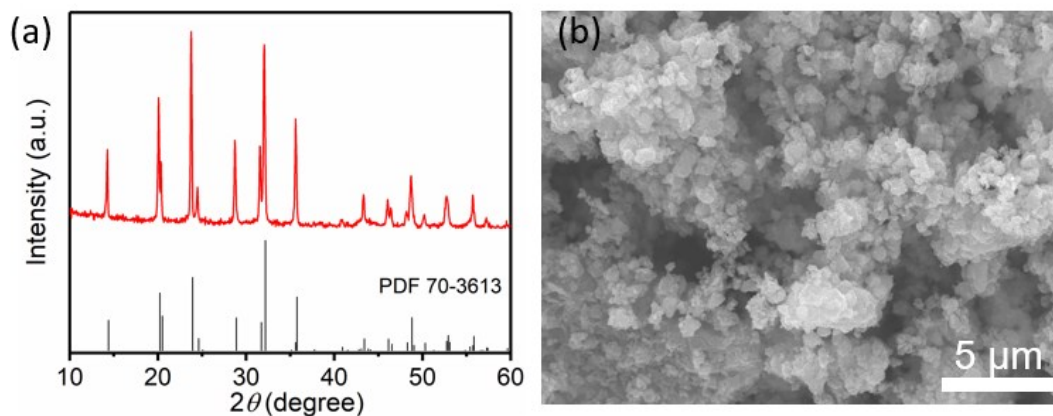

**Figure S10.** (a) XRD pattern and (b) SEM image of NVP cathode.

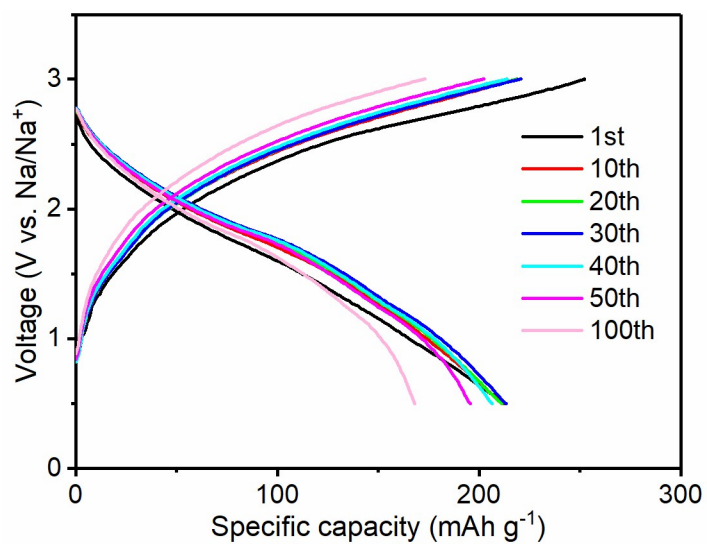

**Figure S11.** Charge/discharge curves of the DP-MoS<sub>2</sub>//NVP full cell at a current density of 0.5 A g<sup>-1</sup>.

**Table S1.** Impedance parameters predicted from the Nyquist plots using the equivalent circuit shown in Figure S7.

| Electrode           | DP-MoS <sub>2</sub> | 2H-MoS <sub>2</sub> |
|---------------------|---------------------|---------------------|
| R <sub>o</sub> (Ω)  | 18.9                | 22.3                |
| R <sub>f</sub> (Ω)  | 3.0                 | 5.1                 |
| R <sub>ct</sub> (Ω) | 13.8                | 31.3                |

**Table S2.** Comparison of the electrochemical performance of published SIB anode against the current work

| Material                               | Preparation method                                 | Electrochemical performance                                         |                                                                                                      | Ref.         |
|----------------------------------------|----------------------------------------------------|---------------------------------------------------------------------|------------------------------------------------------------------------------------------------------|--------------|
|                                        |                                                    | Cyclic performance                                                  | Rate performance                                                                                     |              |
| DP-MoS <sub>2</sub>                    | Solvothermal                                       | 220 mAh g <sup>-1</sup> at 2A g <sup>-1</sup> after 500 cycles      | 255 mAh g <sup>-1</sup> at 1.0 A g <sup>-1</sup> ; 220 mAh g <sup>-1</sup> at 2.0 A g <sup>-1</sup>  | Current work |
| 1T MoS <sub>2</sub> /GF                | Solvothermal                                       | 313 mAh g <sup>-1</sup> at 0.05 A g <sup>-1</sup> after 200 cycles  | 208 mAh g <sup>-1</sup> at 1.0 A g <sup>-1</sup> ; 175 mAh g <sup>-1</sup> at 2.0 A g <sup>-1</sup>  | S1           |
| 1T-MoS <sub>2</sub>                    | Li <sup>+</sup> intercalation assisted exfoliation | 324 mAh g <sup>-1</sup> at 1.0 A g <sup>-1</sup> after 200 cycles   | 301 mAh g <sup>-1</sup> at 1.0 A g <sup>-1</sup> ; 253 mAh g <sup>-1</sup> at 2.0A g <sup>-1</sup>   | S2           |
| MXene                                  | HF etching                                         | ~140 mAh g <sup>-1</sup> at 0.02 A g <sup>-1</sup> after 100 cycles | 113 mAh g <sup>-1</sup> at 1.0 A g <sup>-1</sup> ; 90 mAh g <sup>-1</sup> at 2.0 A g <sup>-1</sup>   | S3           |
| Expanded graphite                      | Two-step oxidation-reduction                       | ~180 mAh g <sup>-1</sup> at 0.1 A g <sup>-1</sup>                   | 184 mAh g <sup>-1</sup> at 0.1 mA g <sup>-1</sup> ; 91 mAh g <sup>-1</sup> at 0.2 mA g <sup>-1</sup> | S4           |
| MoS <sub>2</sub> -PEO composite        | Exfoliation-restacking                             | 148 mAh g <sup>-1</sup> at 0.05 A g <sup>-1</sup> after 70 cycles   | 127 mAh g <sup>-1</sup> at 0.5 A g <sup>-1</sup> ; 112 mAh g <sup>-1</sup> at 1.0A g <sup>-1</sup>   | S5           |
| MoS <sub>2</sub> /C                    | Hydrothermal and calcination                       | ~120 mAh g <sup>-1</sup> at 1.0 A g <sup>-1</sup> after 800 cycles  | 125 mAh g <sup>-1</sup> at 1.0 A g <sup>-1</sup> ; 100 mAh g <sup>-1</sup> at 2.0 A g <sup>-1</sup>  | S6           |
| MoS <sub>2-x</sub> Se <sub>x</sub> /GF | Hydrothermal and calcination                       | ~165 mAh g <sup>-1</sup> at 0.2 A g <sup>-1</sup> after 500 cycles  | 180 mAh g <sup>-1</sup> at 1.0 A g <sup>-1</sup> ; 175 mAh g <sup>-1</sup> at 2.0 A g <sup>-1</sup>  | S7           |
| VO-MoS <sub>2</sub> /N-RGO             | Solvothermal                                       | 245 mAh g <sup>-1</sup> at 1.0 A g <sup>-1</sup> after 1300 cycles  | 248 mAh g <sup>-1</sup> at 1.0 A g <sup>-1</sup> ; 243 mAh g <sup>-1</sup> at 2.0 A g <sup>-1</sup>  | S8           |

## References

- [S1] X. Geng, Y. Jiao, Y. Han, A. Mukhopadhyay, L. Yang, and H. Zhu, *Adv. Funct. Mater.*, 2017, **27**, 1702998.
- [S2] D. Sun, D. Huang, H. Wang, G.-L. Xu, X. Zhang, R. Zhang, Y. Tang, D. A. EI-Hady, W. Alshitari, and A. S. AL-Bogami, *Nano Energy*, 2019, **61**, 361-369.
- [S3] X. Wang, S. Kajiyama, H. Iinuma, E. Hosono, S. Oro, I. Moriguchi, M. Okubo, and A. Yamada, *Nat. Commun.*, 2015, **6**, 6544.
- [S4] Y. Wen, K. He, Y. Zhu, F. Han, Y. Xu, I. Matsuda, Y. Ishii, J. Cumings, and C. Wang, *Nat. Commun.*, 2014, **5**, 4033.
- [S5] Y. Li, Y. Liang, F. C. Robles Hernandez, H. Deog Yoo, Q. An, and Y. Yao, *Nano Energy*, 2015, **15**, 453-461.
- [S6] R. Wang, S. Wang, X. Peng, Y. Zhang, D. Jin, P. K. Chu, and L. Zhang, *ACS Appl. Mater. Interfaces.*, 2017, **9**, 32745-32755
- [S7] G. Jia, D. Chao, N. H. Tiep, Z. Zhang, and H. J. Fan, *Energy Storage Mater.*, 2018, **14**, 136-142.
- [S8] P. Li, J. Y. Jeong, B. Jin, K. Zhang, and J. H. Park, *Adv. Energy Mater.*, 2018, **8**, 1703300.
